# Supplementary material for: Structural basis of promoter recognition by Staphylococcus aureus RNA polymerase
Source: PubMed Central journal article supplement (PMC11156646; doi:10.1038/s41467-024-49229-6), 2024-06-06
Supplement: 41467_2024_49229_MOESM1_ESM.pdf [file 41467_2024_49229_MOESM1_ESM.pdf]

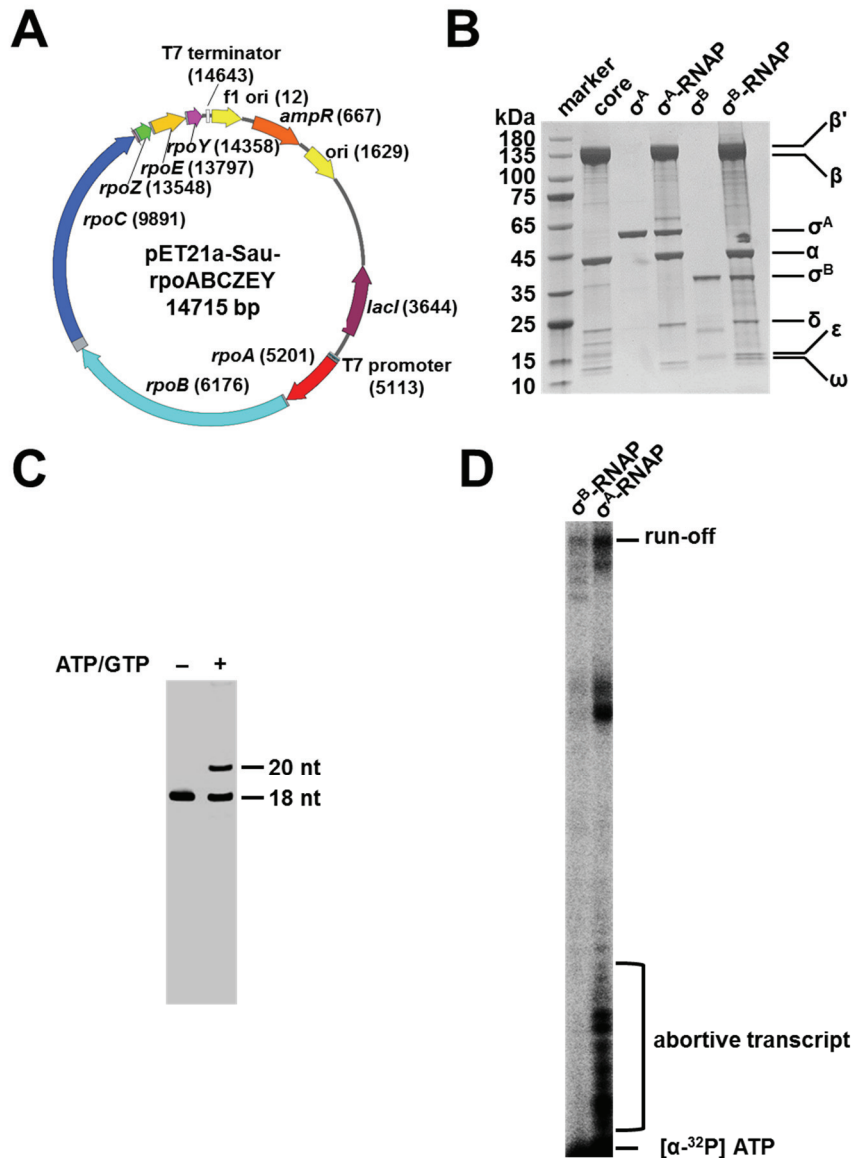

**Supplementary Figure 1. Purification of *S. aureus* RNAP.**

(A) The map of plasmid pET21a-Sau-rpoABCZEY.

(B) SDS-PAGE of *S. aureus*  $\sigma^A$ ,  $\sigma^B$ , RNAP core and holoenzyme. Source data are provided as a Source Data file. Experiments were repeated independently three times with similar results.

(C) Primer extension assay confirms the activity of *S. aureus* RNAP core enzyme. Source data are provided as a Source Data file. Experiments were repeated independently three times with similar results.

(D) Run-off transcription assay confirms the activity of *S. aureus* RNAP holoenzyme. Source data are provided as a Source Data file. Experiments were repeated independently three times with similar results.

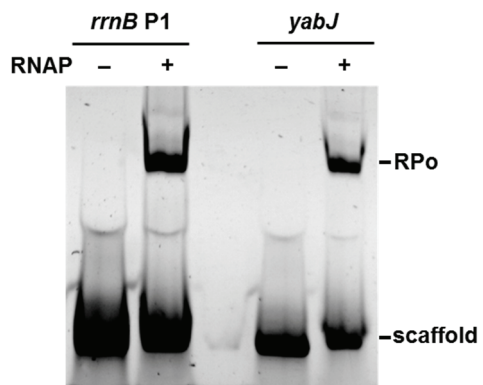

**Supplementary Figure 2. EMSA confirms the formation of  $\sigma^A$ -RPo and  $\sigma^B$ -RPo.**

1.2  $\mu$ M DNA scaffold is incubated with or without 1  $\mu$ M *S. aureus* RNAP holoenzyme for 10 min at 37°C. Source data are provided as a Source Data file. Experiments were repeated independently three times with similar results.

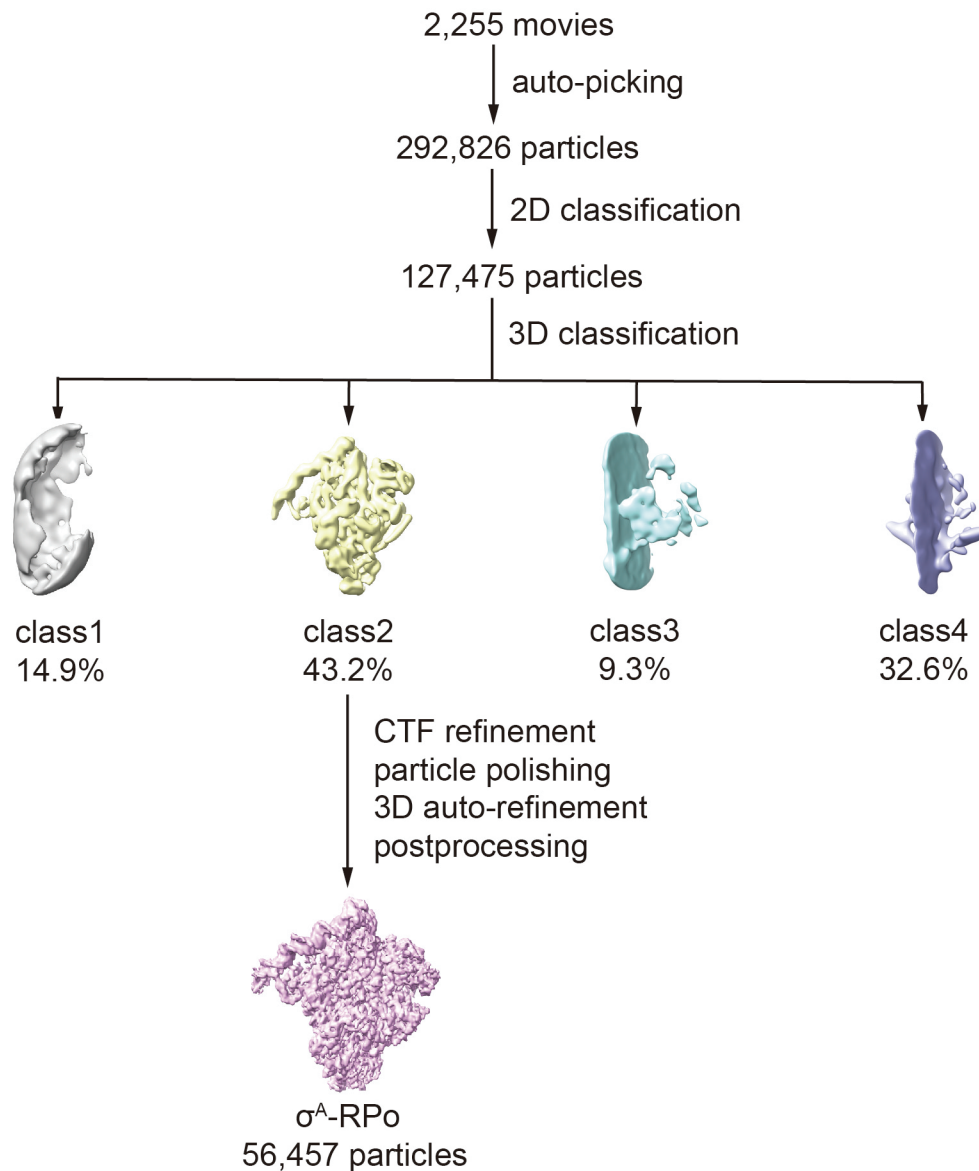

**Supplementary Figure 3. Data processing pipeline for  $\sigma^A$ -RPo.**

292,826 particles were picked from 2,255 movies using templates in RELION. After 2D classification, 127,475 particles were selected for 3D classification. After 3D classification, 56,457 particles were selected for auto-refinement, CTF refinement, particle polishing, and postprocessing.

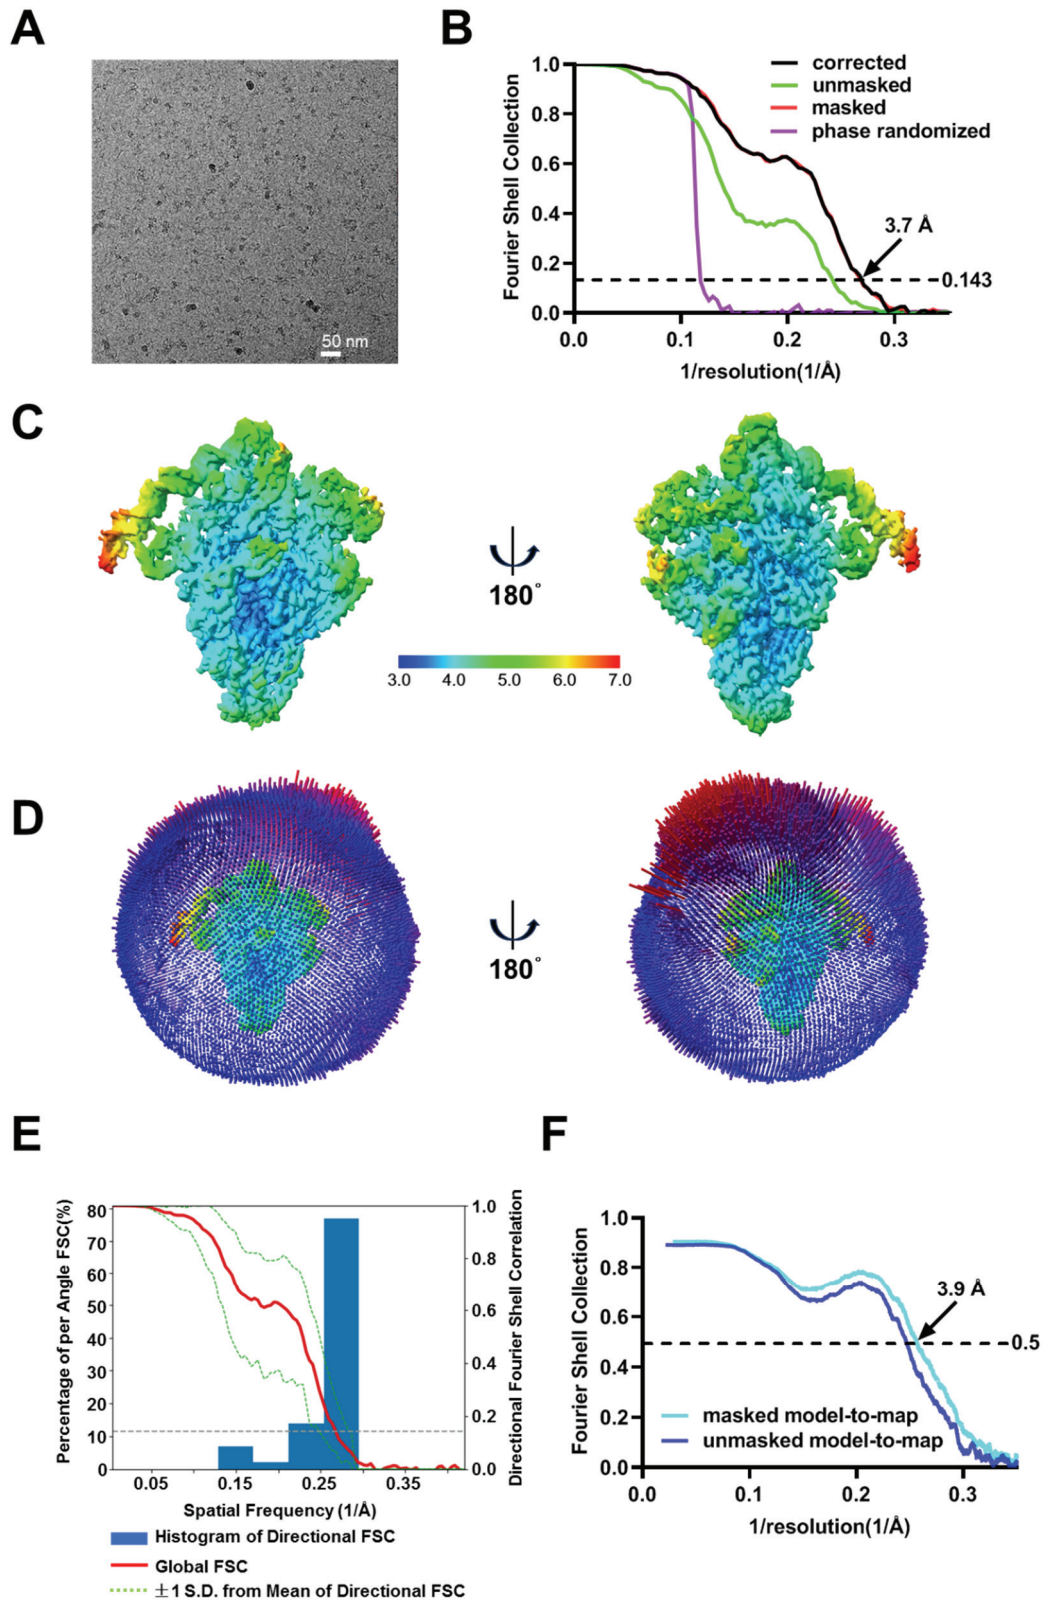

**Supplementary Figure 4. Data validation for  $\sigma^A$ -RPo.**

(A) A representative cryo-EM micrograph of  $\sigma^A$ -RPo.

(B) Corrected, masked, unmasked, and phase randomized FSC curves. The dashed line

represents the 0.143 FSC cutoff.

(C) Cryo-EM density map colored by local resolution.

(D) Angular distribution of particle projections.

(E) The 3DFSC curve was created on <https://3dfsc.salk.edu/>.

(F) Masked and unmasked map-to-model FSC curves. The dashed line represents the 0.5 FSC cutoff.

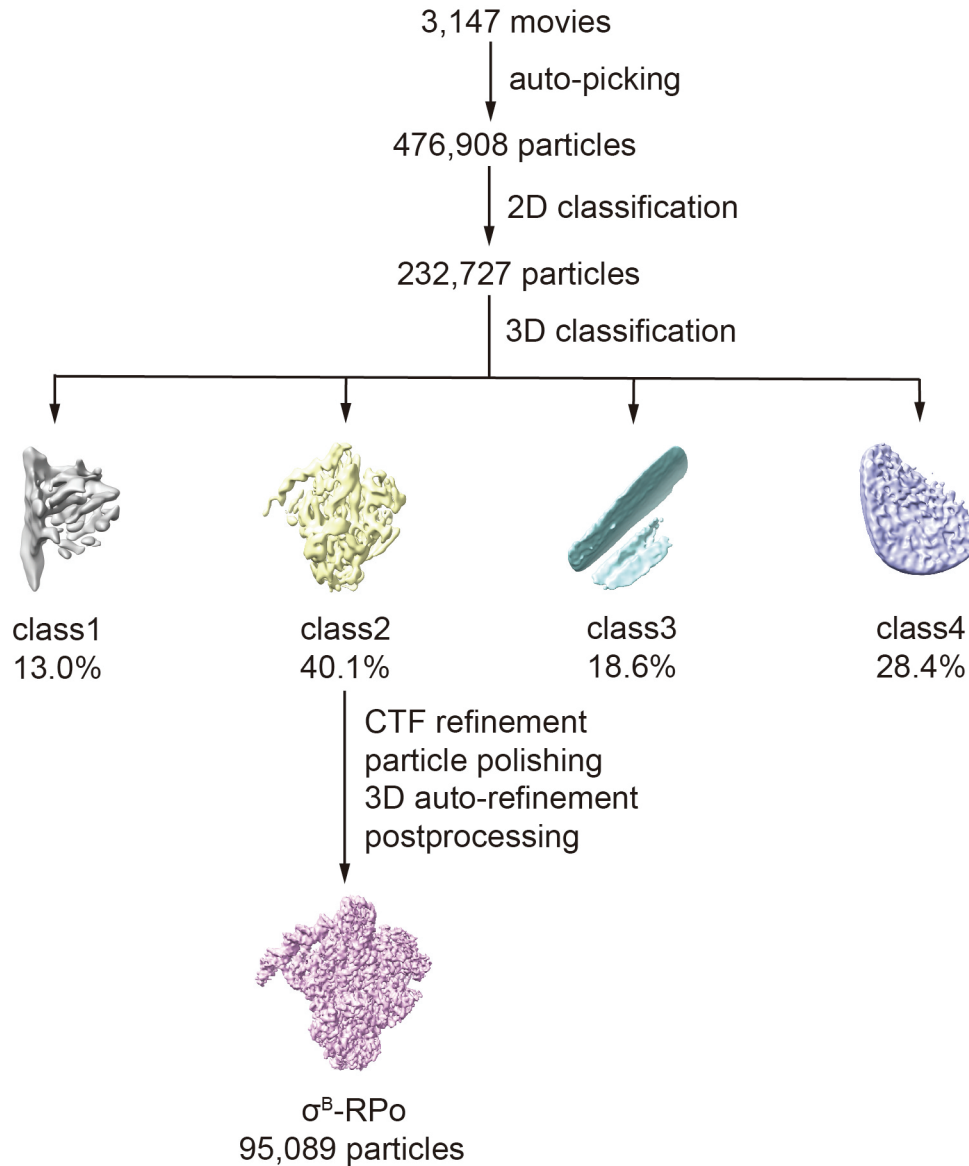

**Supplementary Figure 5. Data processing pipeline for  $\sigma^B$ -RPo.**

476,908 particles were picked from 3,147 movies using templates in RELION. After 2D classification, 232,727 particles were selected for 3D classification. After 3D classification, 95,089 particles were selected for auto-refinement, CTF refinement, particle polishing, and postprocessing.

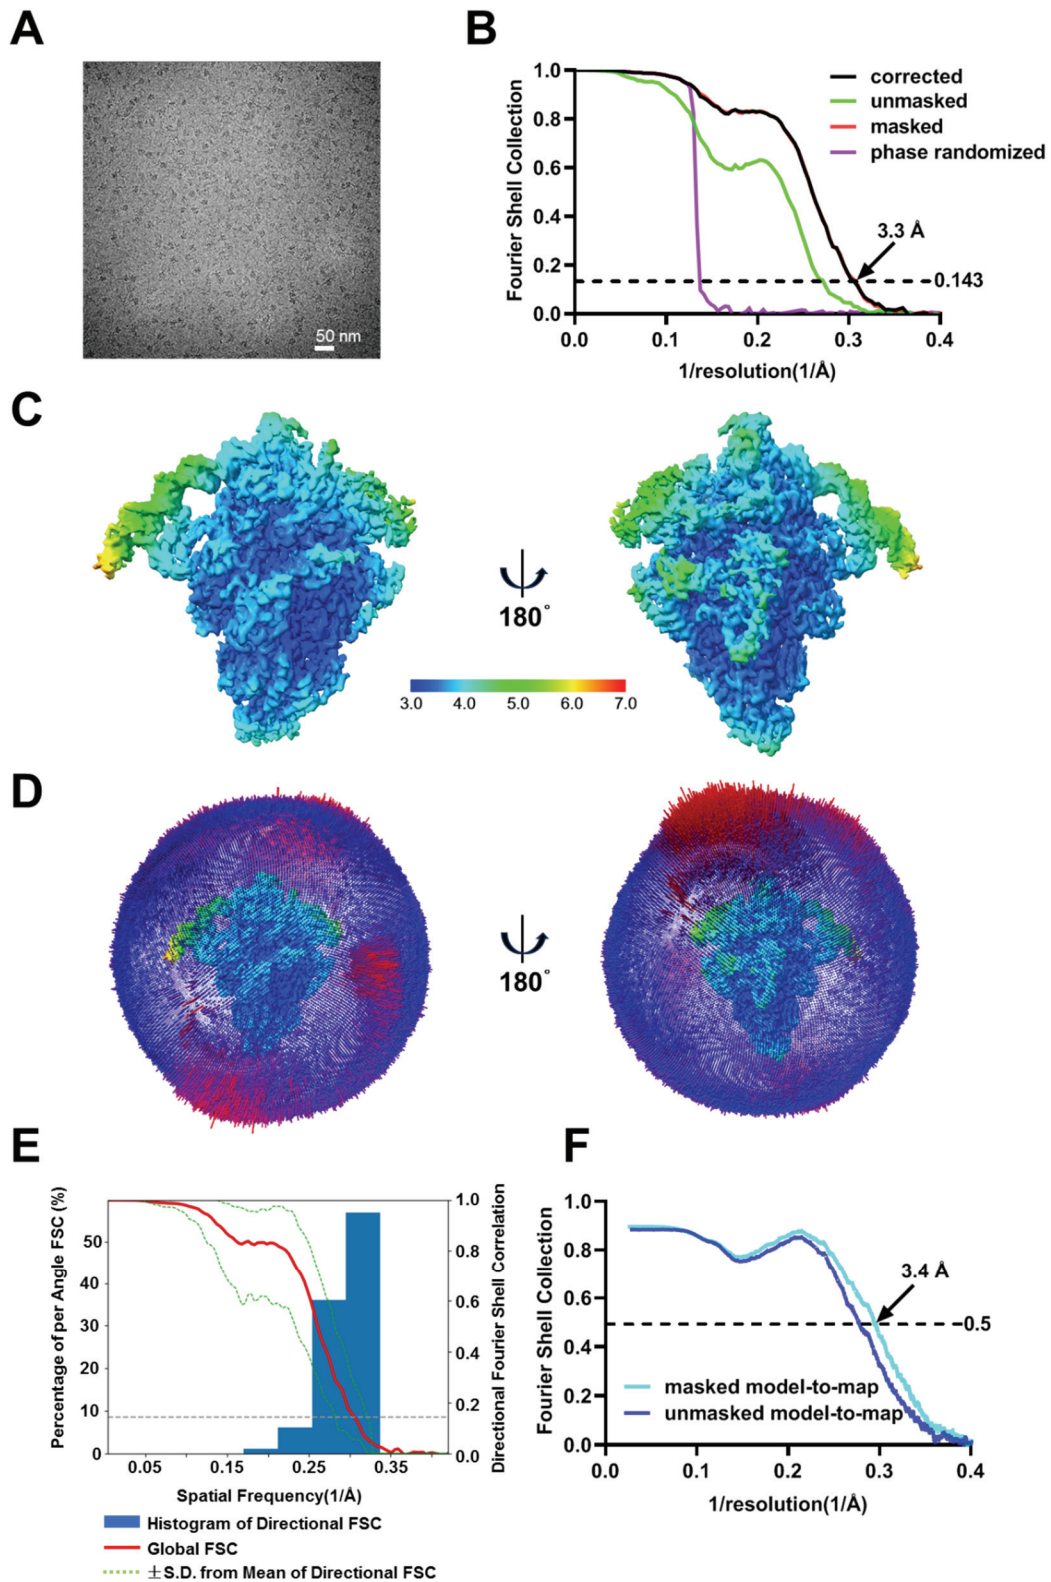

**Supplementary Figure 6. Data validation for  $\sigma^B$ -RPo.**

(A) A representative cryo-EM micrograph of  $\sigma^B$ -RPo.

(B) Corrected, masked, unmasked, and phase randomized FSC curves. The dashed line represents the 0.143 FSC cutoff.



(C) Cryo-EM density map colored by local resolution.

(D) Angular distribution of particle projections.

(E) The 3DFSC curve was created on <https://3dfsc.salk.edu/>.

(F) Masked and unmasked map-to-model FSC curves. The dashed line represents the 0.5 FSC cutoff.



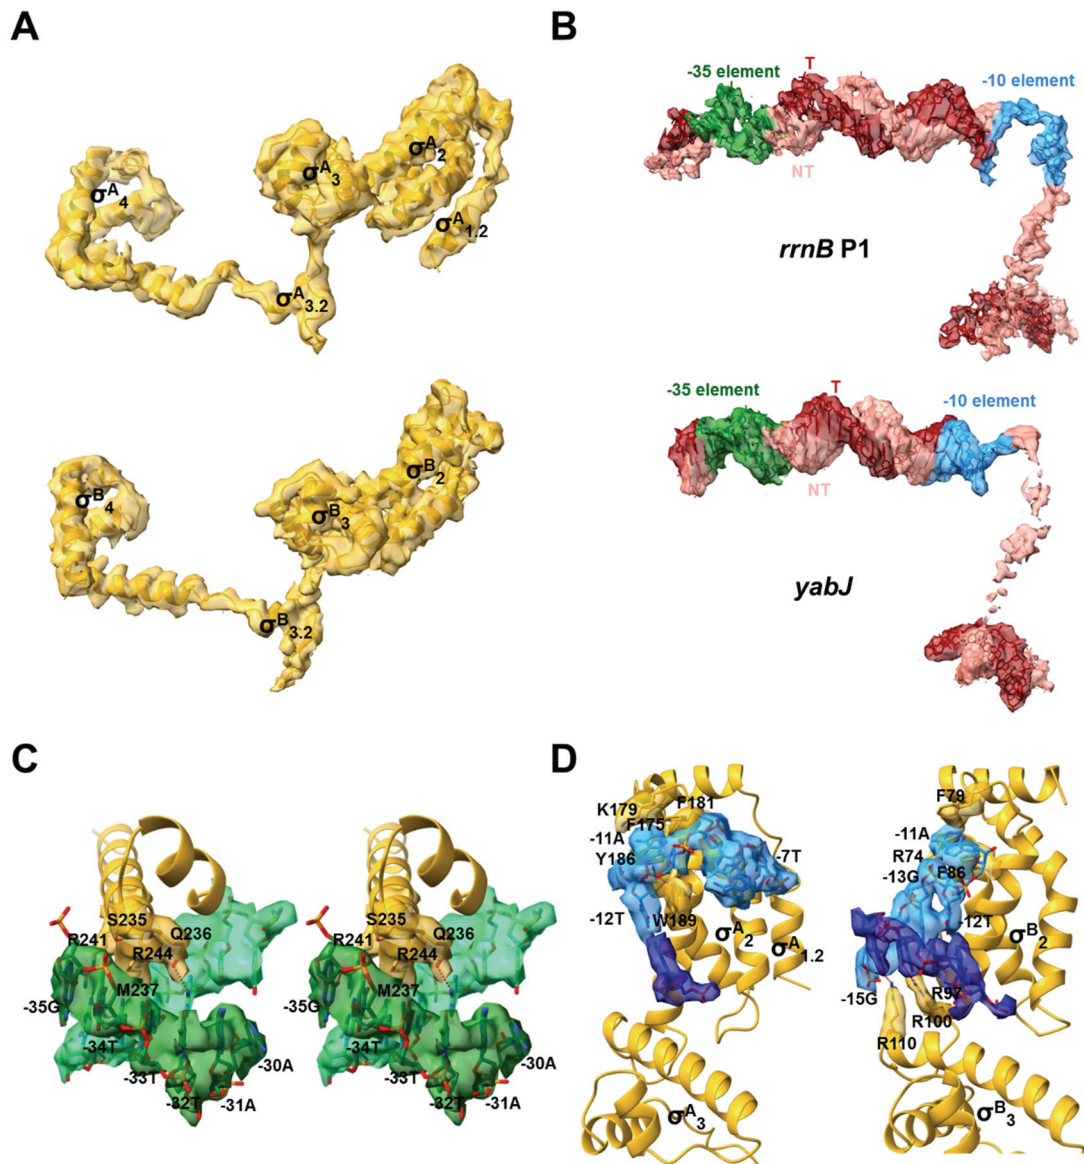

**Supplementary Figure 7. Representative electron potential map and superimposed model.**

(A) The electron potential map without B-factor sharpening and the superimposed model of  $\sigma^A$  and  $\sigma^B$ . The contour level is 0.01. The carve radius is 3.4 Å.

(B) The electron potential map without B-factor sharpening and the superimposed model of *rrnB* P1 and *yabJ*. The contour level is 0.01. The carve radius is 3.4 Å.

(C) The electron potential map with B-factor sharpening and the superimposed model of  $\sigma^B$ -DNA. The contour level is 0.01. The carve radius is 3.4 Å.

(D) The electron potential map with B-factor sharpening and the superimposed model of  $\sigma^A$ -DNA and  $\sigma^B$ -DNA. The contour level is 0.01. The carve radius is 3.4 Å.

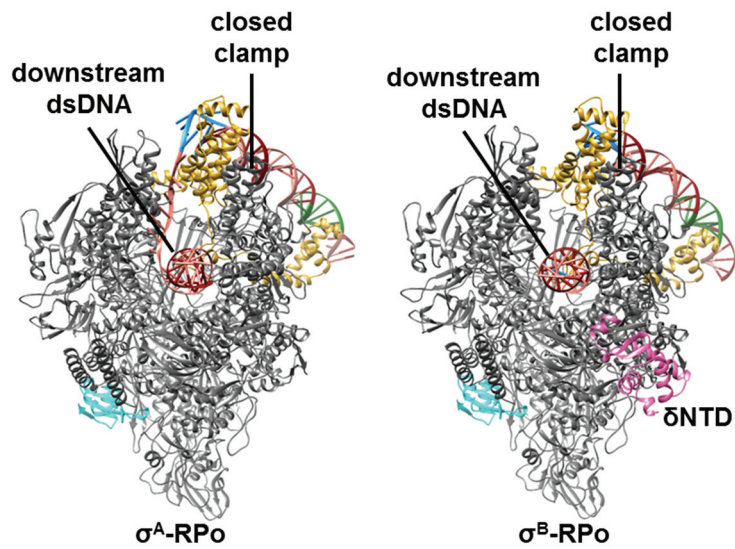

**Supplementary Figure 8. The clamp adopts a closed conformation, securing the transcription bubble and downstream dsDNA in the main channel.**

The models of  $\sigma^A$ -RPo (left) and  $\sigma^B$ -RPo (right) are shown in cartoon representation. Gray, RNAP core except  $\epsilon$  and  $\delta$ ; cyan,  $\epsilon$ ; pink,  $\delta$ ; yellow,  $\sigma^A$  and  $\sigma^B$ ; salmon, nontemplate strand DNA; red, template strand DNA; green, the -35 element; blue, the -10 element.

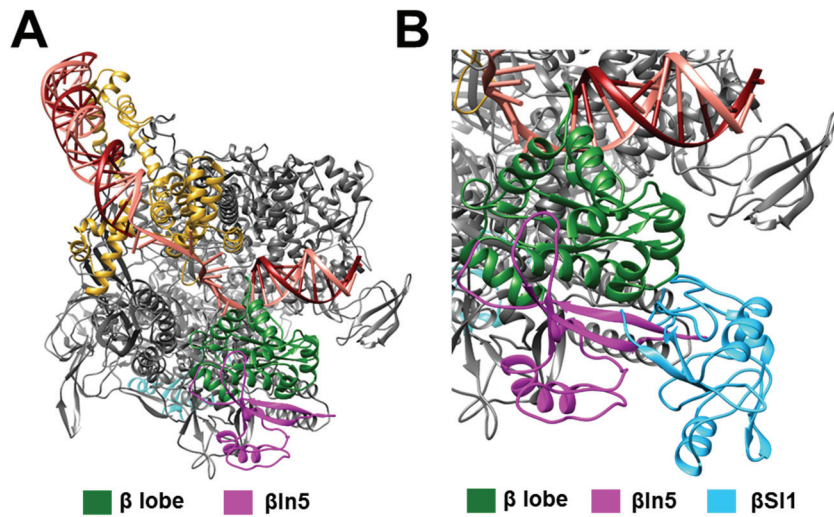

**Supplementary Figure 9.  $\beta$ In5 inserts into and packs against the  $\beta$  lobe.**

(A) The overall structure of *S. aureus*  $\sigma^A$ -RPO is shown in cartoon representation. Gray, RNAP core; cyan,  $\epsilon$ ; magenta,  $\beta$ In5; green,  $\beta$  lobe; yellow,  $\sigma^A$ ; salmon, nontemplate strand DNA; red, template strand DNA.

(B) Structural superimposition of *E. coli*  $\sigma^{70}$ -RPO (PDB: 6CA0) and *S. aureus*  $\sigma^A$ -RPO. Gray, *S. aureus* RNAP core; cyan, *E. coli*  $\beta$ S11; magenta, *S. aureus*  $\beta$ In5; green, *S. aureus*  $\beta$  lobe; salmon, nontemplate strand DNA; red, template strand DNA.

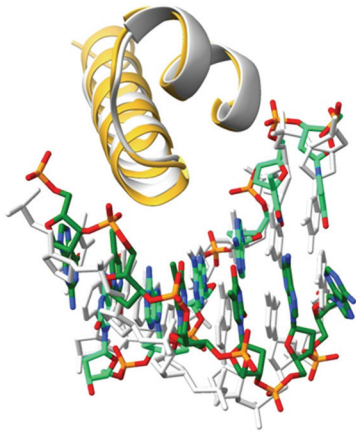

**Supplementary Figure 10.  $\sigma^B_4$  interacts with the -35 element in the same way as  $\sigma^A_4$ .**

Comparison of  $\sigma^A_4$ -DNA interactions (gray) and  $\sigma^B_4$ -DNA interactions (colors as in Fig. 2A).

The models of  $\sigma^A_4$  and  $\sigma^B_4$  are shown in cartoon representation. The models of -35 element are shown in sticks.

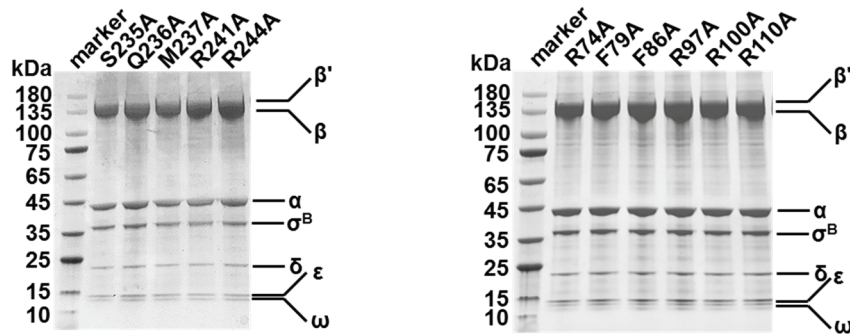

**Supplementary Figure 11.  $\sigma^B$  derivatives form holoenzyme with RNAP core.**

$\sigma^B$  derivatives were incubated with RNAP core enzyme. Then size exclusion chromatography and SDS-PAGE were used to confirm that  $\sigma^B$  derivatives can form holoenzyme with RNAP core. Source data are provided as a Source Data file. Experiments were repeated independently three times with similar results.

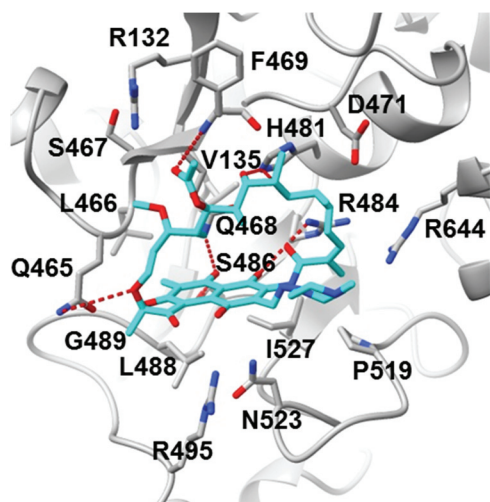

**Supplementary Figure 12. Structural modeling of *S. aureus* RNAP-rifampin complex.**

*S. aureus* RNAP is shown in cartoon representation. Rifampin and its interacting residues are shown in sticks. Hydrogen bonds are shown in red dashed lines.

**Supplementary Table 1. List of  $\sigma^B$ -dependent promoters.**

| Gene id       | -35 element | length of spacer | -10 element |
|---------------|-------------|------------------|-------------|
| <i>ccrA</i>   | TTTTAA      | 12               | GGGGAT      |
| <i>yabJ</i>   | GTTTAA      | 14               | GGGTAT      |
| <i>esxA</i>   | GTTTAA      | 12               | GGGTAT      |
| <i>egc</i>    | GATTAG      | 13               | GGGTAT      |
| <i>katA</i>   | GTTTAA      | 14               | GGGTAA      |
| <i>asp23</i>  | GTTTAA      | 14               | GGGTAT      |
| <i>opuD</i>   | GATTAA      | 14               | GGGTAT      |
| <i>clpL</i>   | GTTTTA      | 14               | TGGAAA      |
| <i>clfA</i>   | GATTAA      | 13               | GGGTAT      |
| <i>csb3</i>   | GTTTAA      | 14               | GTGTAT      |
| <i>csb4</i>   | GTTTAA      | 14               | GGGAAA      |
| <i>csb7</i>   | GTGTGA      | 14               | GGGTAG      |
| <i>csb8</i>   | GTTTAG      | 13               | GGGTAA      |
| <i>csb9</i>   | GTTTTA      | 14               | TGGTAT      |
| <i>csb12</i>  | GTTTTA      | 14               | GGGTAA      |
| <i>csb19</i>  | GTTTAG      | 14               | CGCTAT      |
| <i>csb24</i>  | GTTTAT      | 14               | GGATAA      |
| <i>csb28</i>  | GATTAA      | 15               | GGGTAA      |
| <i>csb33</i>  | GTTTGA      | 14               | GGGAAT      |
| <i>sa0455</i> | GTTTAA      | 14               | GGGTAT      |
| <i>sa0572</i> | GTATAT      | 12               | GGGAAT      |
| <i>sa0772</i> | GTTTAG      | 13               | GGGTAA      |
| <i>sa0752</i> | GTTTAA      | 14               | GGGTAA      |
| <i>sa2452</i> | GATTCA      | 13               | GGGTAA      |
| <i>sa0632</i> | GTTTTA      | 13               | GGGTAT      |
| <i>sa2309</i> | GTTTAA      | 14               | GGGAAA      |
| <i>sa0359</i> | GAATAA      | 13               | GGGTAA      |
| <i>mw0922</i> | GTTTAA      | 14               | GGGTAT      |



**Supplementary Table 2. Cryo-EM data collection and refinement statistics.**

|                                       | $\sigma^A$ -RPO | $\sigma^B$ -RPO |
|---------------------------------------|-----------------|-----------------|
| <b>Data collection and processing</b> |                 |                 |
| Microscope                            | Titan Krios     | Titan Krios     |
| Voltage (kV)                          | 300             | 300             |
| Detector                              | Falcon 4        | Falcon 4        |
| Electron exposure (e/Å <sup>2</sup> ) | 51              | 51              |
| Defocus range (μm)                    | 1.0-2.0         | 1.0-2.0         |
| Data collection mode                  | Counting        | Counting        |
| Physical pixel size (Å/pixel)         | 1.19            | 1.19            |
| Symmetry imposed                      | C1              | C1              |
| Initial particle images               | 292,826         | 476,908         |
| Final particle images                 | 56,457          | 95,089          |
| Map resolution (Å) <sup>a</sup>       | 3.7             | 3.3             |
| <b>Refinement</b>                     |                 |                 |
| Root-mean-square deviation            |                 |                 |
| Bond lengths (Å)                      | 0.004           | 0.003           |
| Bond angles (°)                       | 0.603           | 0.606           |
| Molprobit statistics                  |                 |                 |
| Clashscore                            | 9               | 9               |
| Rotamer outliers (%)                  | 0.07            | 0.18            |
| Cβ outliers (%)                       | 0               | 0               |
| Ramachandran plot                     |                 |                 |
| Favored (%)                           | 98              | 98              |
| Outliers (%)                          | 0               | 0               |
| Map-to-model correlation coefficient  | 0.82            | 0.84            |

<sup>a</sup>Gold-standard FSC 0.143 cutoff criteria.
