# Supplementary material for: Structural basis of promoter recognition by Staphylococcus aureus RNA polymerase
Source: PubMed Central journal article supplement (PMC11156646; doi:10.1038/s41467-024-49229-6), 2024-06-06
Supplement: 41467_2024_49229_MOESM3_ESM.pdf [file 41467_2024_49229_MOESM3_ESM.pdf]

## **Description of Additional Supplementary File**

**Supplementary Data 1:-** The sequences of oligonucleotides and plasmids in this work.
